# Supplementary material for: A Comprehensive Characterization of Stemness in Cell Lines and Primary Cells of Pancreatic Ductal Adenocarcinoma
Source: MDPI journal article supplement (doi:10.3390/ijms231810663), 2022-09-14
Supplement: s1 [file s1]

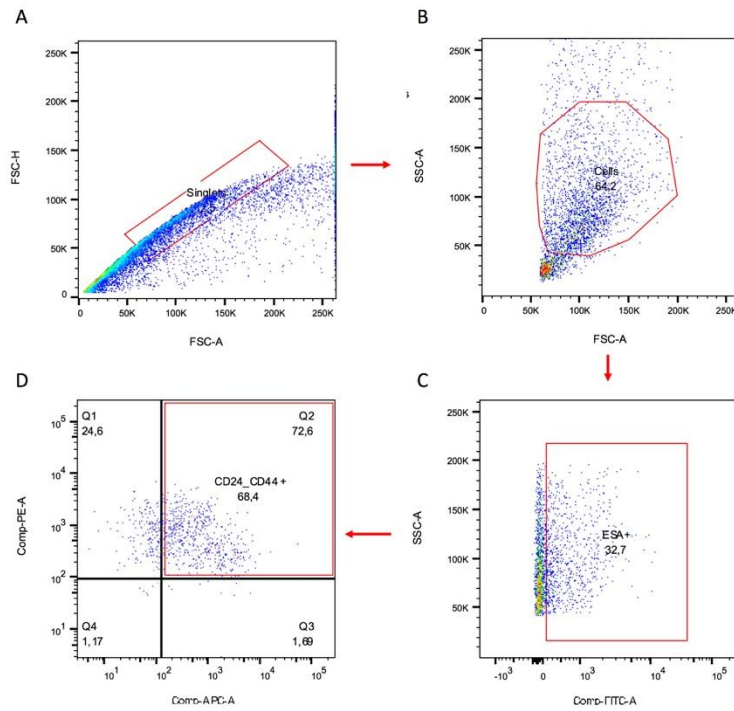

**Figure S1. Gating strategy for the stem phenotypes CS44+/CD24+/ESA+.** Representative flow cytometry plots read outs of ESA/CD24/CD44 markers: PDAC tumor-derived cells were gated based on the FSC-H/FSC-A (A), then gated based on FSC-A/SSC-A (B), then selected for the marker ESA+ (C) and finally selected for the positivity to CD24 and CD44 markers (D).

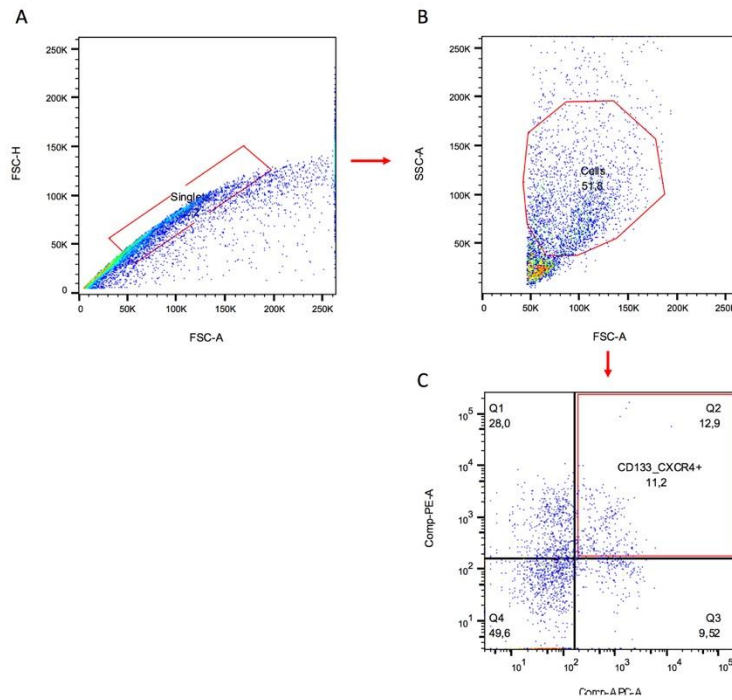

**Figure S2. Gating strategy for the stem phenotypes CD133<sup>+</sup>/CXCR4<sup>+</sup>.** Representative flow cytometry plots read outs of CD133/CXCR4 markers: PDAC tumor-derived cells were gated based on the FSC-H/FSC-A (A), then gated based on FSC-A/SSC-A (B) and then selected for the positivity to CD133 and CXCR4 markers (C).

A

| Patient characteristics                |                           |
|----------------------------------------|---------------------------|
| Sex (M/F)                              | 32/23                     |
| Age (years; mean±sd)                   | 66.2±10                   |
| pT1/T2/T3 [n, (%)]                     | 1 (1.8)/1 (1.8)/53 (96.4) |
| pN1 [n, (%)]                           | 40 (72.7)                 |
| Lymph nodes positive (%)               | 32.4 (14.22-46.8)         |
| pM1 [n, (%)]                           | 7 (12.7)                  |
| R1 [n, (%)]                            | 30 (54.5)                 |
| Grading: G1/G2/G3 [n, (%)]             | 1 (1.8)/32 (58.2)/22 (40) |
| Tumor size (cm)                        | 2.5 (2-3)                 |
| Neo-adjuvant chemotherapy [n, (%)]     | 3 (5.5)                   |
| Adjuvant chemo/radiotherapy [n, (%)]   | 39 (79.2)                 |
| Follow-up (median)                     | 13.1 years                |
| Overall survival [median (95%CI) ]     | 502 (313-691) days        |
| Disease free survival [median (95%CI)] | 366 (215-517) days        |
| Local Relapse [n, (%)]                 | 11 (20)                   |
| Distant relapse [n, (%)]               | 26 (47.3)                 |
| - Liver                                | 14 (53.8)                 |
| - Lung                                 | 5 (19.2)                  |
| - Lymph nodes                          | 5 (19.2)                  |
| - Peritoneal Carcinomatosis            | 10 (38.5)                 |
| - Other sites                          | 3 (11.5)                  |

B

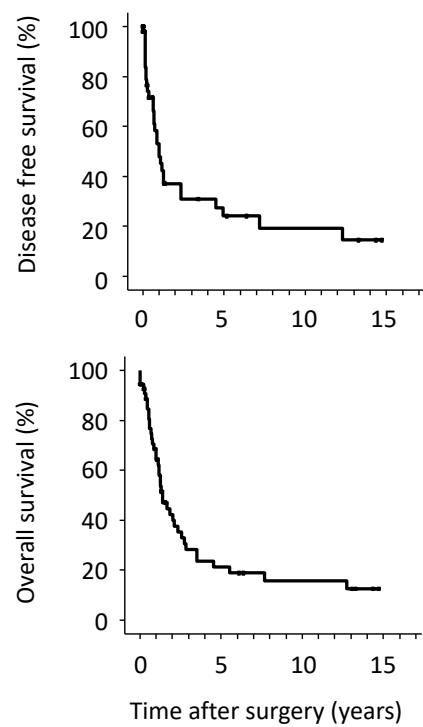

**Figure S3. Cohort of 55 patients affected by PDAC. (a)** Clinical, pathological and anthropometric characteristics of patients. **(b)** Kaplan-Meier curves representing the overall survival and disease-free survival.

**Table S1.** Expression of putative stem cell markers ESA, CD24, CD44 and CD133, CXCR4 in 17 lines of PDAC. The numbers are expressed as a percentage (%) of positive cells on the total of the cells analyzed by FACS.

| Cell line        | Stemness* | ESA+<br>CD24+<br>CD44+ | ESA+<br>CD24+<br>CD44- | ESA+<br>CD24-<br>CD44- | ESA+<br>CD24-<br>CD44+ | ESA-<br>CD24+<br>CD44- | ESA-<br>CD24-<br>CD44- | ESA-<br>CD24-<br>CD44+ | ESA-<br>CD24+<br>CD44+ | ESA+ | CD24+ | CD44+ | CXCR4+<br>CD133-<br>CD133+ | CXCR4+<br>CD133+ | CXCR4-<br>CD133-<br>CD133+ | CXCR4-<br>CD133+ | CXCR4+ | CD133+ |
|------------------|-----------|------------------------|------------------------|------------------------|------------------------|------------------------|------------------------|------------------------|------------------------|------|-------|-------|----------------------------|------------------|----------------------------|------------------|--------|--------|
| <b>MIAPaCa-2</b> | <b>LS</b> | 0                      | 0                      | 0.01                   | 0                      | 0                      | 0.73                   | 99.1                   | 0.16                   | 0.01 | 0.12  | 99.3  | 0.09                       | 0                | 99.9                       | 0                | 0.09   | 0      |
| <b>Hst-766</b>   | <b>LS</b> | 0.01                   | 0                      | 0                      | 0.12                   | 0                      | 0.74                   | 88.8                   | 10.29                  | 0.13 | 10.3  | 99.3  | 0.56                       | 0.02             | 99.4                       | 0                | 0.58   | 0.0    |
| <b>Panc-2</b>    | <b>LS</b> | 0.08                   | 0.04                   | 56.9                   | 42.7                   | 0                      | 0.29                   | 0                      | 0                      | 99.7 | 0.13  | 42.7  | 0.8                        | 0.18             | 97.2                       | 1.84             | 0.98   | 2.02   |
| <b>Panc-1</b>    | <b>LS</b> | 0.13                   | 0                      | 16.4                   | 82.7                   | 0                      | 0.73                   | 0                      | 0                      | 99.3 | 0.13  | 82.8  | 0                          | 0.01             | 99.9                       | 0                | 0.01   | 0.01   |
| <b>HPAF-II</b>   | <b>LS</b> | 0.31                   | 0                      | 4.6                    | 94.8                   | 0                      | 0.31                   | 0                      | 0                      | 99.7 | 0.31  | 95.1  | 0.48                       | 0.37             | 99.1                       | 0                | 0.8    | 0.37   |
| <b>PT45</b>      | <b>LS</b> | 1.3                    | 0                      | 0.02                   | 24.6                   | 0                      | 0.31                   | 73.6                   | 0.19                   | 25.9 | 1.5   | 99.7  | 0.12                       | 0.05             | 99.8                       | 0                | 0.2    | 0.05   |
| <b>PC</b>        | <b>LS</b> | 1.5                    | 0                      | 3                      | 94.9                   | 0                      | 0.61                   | 0.03                   | 0                      | 99.4 | 1.5   | 96.4  | 0.29                       | 0.02             | 99.6                       | 0.05             | 0.3    | 0.07   |
| <b>AsPC-1</b>    | <b>LS</b> | 2.8                    | 0.06                   | 1.8                    | 94.9                   | 0                      | 0.42                   | 0                      | 0                      | 99.6 | 2.8   | 97.7  | 0.52                       | 0                | 99.5                       | 0                | 0.5    | 0      |
| <b>BI</b>        | <b>LS</b> | 3.5                    | 2.2                    | 54.8                   | 39.4                   | 0                      | 0.23                   | 0                      | 0                      | 99.8 | 5.6   | 42.8  | 0.76                       | 0.7              | 65.2                       | 33.3             | 1.5    | 34.0   |
| <b>PaCa-44</b>   | <b>MS</b> | 6.9                    | 1.3                    | 32.9                   | 57.4                   | 0.02                   | 1.4                    | 0                      | 0.04                   | 98.5 | 8.3   | 64.4  | 0.22                       | 0.1              | 94.3                       | 5.4              | 0.3    | 5.5    |
| <b>Capan-1</b>   | <b>MS</b> | 11.6                   | 2.1                    | 18.7                   | 66.9                   | 0                      | 0.64                   | 0                      | 0                      | 99.4 | 13.7  | 78.5  | 0                          | 0.36             | 5.07                       | 94.6             | 0.4    | 94.9   |
| <b>T3M4</b>      | <b>MS</b> | 13.2                   | 0.97                   | 10.5                   | 75.1                   | 0                      | 0.3                    | 0                      | 0                      | 99.7 | 14.1  | 88.2  | 2.23                       | 0.13             | 97.6                       | 0                | 2.4    | 0.13   |
| <b>SKPC-1</b>    | <b>MS</b> | 17.4                   | 0                      | 0.8                    | 62.1                   | 0                      | 0.65                   | 11.41                  | 7.6                    | 80.4 | 25    | 98.5  | 0.67                       | 0.21             | 98.9                       | 0.13             | 0.9    | 0.34   |
| <b>BxPc-3</b>    | <b>HS</b> | 89.7                   | 2                      | 0.91                   | 4.2                    | 0.38                   | 1.13                   | 0                      | 1.6                    | 96.8 | 93.7  | 95.6  | 1.42                       | 0.1              | 98.4                       | 0.05             | 1.5    | 0.15   |
| <b>PaCa-3</b>    | <b>HS</b> | 93.6                   | 6.3                    | 0.06                   | 0.01                   | 0                      | 0                      | 0                      | 0                      | 100  | 99.9  | 93.6  | 0                          | 1.18             | 12.2                       | 86.6             | 1.2    | 87.8   |
| <b>CFPAC-1</b>   | <b>HS</b> | 98                     | 0.95                   | 0.16                   | 0.81                   | 0                      | 0.09                   | 0                      | 0.2                    | 99.9 | 99    | 98.8  | 0                          | 1.94             | 1.53                       | 96.5             | 1.9    | 98.5   |
| <b>A8184</b>     | <b>HS</b> | 99.4                   | 0.5                    | 0.04                   | 0.07                   | 0                      | 0.02                   | 0                      | 0.02                   | 99.9 | 99.9  | 99.4  | 0.58                       | 0.4              | 77.0                       | 22               | 1      | 22.4   |

\* LS= Low-Stemness cell lines; MS= Medium-Stemness cell lines; HS=High-Stemness cell lines.

**Table S2.** Expression of CCR and CXCR chemokine receptors by FACS analysis. Data are expressed as a percentage (%) of positive cells.

| Cell line | Stemness* | CCR1              | CCR2             | CCR3              | CCR4              | CCR5                | CCR6             | CCR7             | CCR8             | CCR9              | CCR10             | CXCR1              | CXCR2            | CXCR3               | CXCR4             | CXCR5            | CXCR6              | CX3CR1           | XCR1              | CXCL1             |
|-----------|-----------|-------------------|------------------|-------------------|-------------------|---------------------|------------------|------------------|------------------|-------------------|-------------------|--------------------|------------------|---------------------|-------------------|------------------|--------------------|------------------|-------------------|-------------------|
| MIAPaCa2  | LS        | 6                 | 2                | 8                 | 22                | 39                  | 5                | 2                | 1                | 2                 | 2                 | 3                  | 3                | 13                  | 2                 | 7                | 17                 | 5                | 14                | 2                 |
| Hst-766   | LS        | 12                | 1                | 18                | 24                | 47                  | 6                | 9                | 2                | 9                 | 11                | 24                 | 5                | 27                  | 3                 | 6                | 69                 | 0                | 10                | 16                |
| Panc-2    | LS        | 3                 | 3                | 6                 | 39                | 14                  | 2                | 3                | 3                | 45                | 3                 | 18                 | 8                | 15                  | 14                | 3                | 21                 | 2                | 9                 | 8                 |
| Panc-1    | LS        | 5                 | 4                | 12                | 39                | 22                  | 5                | 2                | 1                | 33                | 5                 | 16                 | 11               | 16                  | 3                 | 4                | 11                 | 3                | 2                 | 10                |
| HPAF-II   | LS        | 1                 | 1                | 7                 | 51                | 29                  | 1                | 2                | 1                | 5                 | 17                | 14                 | 1                | 25                  | 4                 | 1                | 9                  | 0                | 16                | 13                |
| PT45      | LS        | 0                 | 0                | 1                 | 4                 | 2                   | 1                | 1                | 0                | 11                | 1                 | 2                  | 0                | 3                   | 0                 | 0                | 1                  | 0                | 12                | 0                 |
| PC        | LS        | 0                 | 1                | 1                 | 27                | 12                  | 0                | 0                | 1                | 1                 | 1                 | 3                  | 1                | 24                  | 3                 | 1                | 2                  | 0                | 15                | 1                 |
| AsPC-1    | LS        | 11                | 3                | 11                | 35                | 44                  | 4                | 7                | 2                | 7                 | 3                 | 11                 | 4                | 42                  | 1                 | 6                | 20                 | 1                | 10                | 1                 |
| BI        | LS        | 3                 | 2                | 5                 | 9                 | 7                   | 3                | 4                | 1                | 4                 | 2                 | 6                  | 5                | 8                   | 8                 | 4                | 7                  | 2                | 14                | 4                 |
| TOT       |           | 3<br>(0.6-8.3)    | 1.8<br>(0.7-3.4) | 6.5<br>(3.2-11.3) | 27<br>(15.5-39.3) | 21.5<br>(9.3-41.4)  | 2.9<br>(0.6-5)   | 2.4<br>(1.6-5.5) | 1.4<br>(0.9-2)   | 6.9<br>(3.3-21.8) | 2.7<br>(1.4-8)    | 10.7<br>(3.1-16.7) | 3.6<br>(0.8-6.7) | 15.6<br>(10.6-25.8) | 2.6<br>(1.6-5.7)  | 3.5<br>(0.9-6)   | 11.2<br>(4.5-20.5) | 0.8<br>(0.1-2.1) | 4.7<br>(2-8.1)    | 4<br>(0.9-11.3)   |
| PaCa-44   | MS        | 4                 | 3                | 7                 | 54                | 23                  | 2                | 3                | 5                | 27                | 2                 | 10                 | 6                | 14                  | 6                 | 2                | 12                 | 2                | 10                | 4                 |
| Capan-1   | MS        | 1                 | 1                | 2                 | 12                | 10                  | 0                | 0                | 0                | 6                 | 7                 | 5                  | 0                | 8                   | 2                 | 0                | 2                  | 0                | 24                | 0                 |
| T3M4      | MS        | 0                 | 1                | 20                | 52                | 33                  | 0                | 2                | 0                | 49                | 27                | 19                 | 0                | 26                  | 11                | 3                | 21                 | 0                | 13                | 17                |
| SKPC-1    | MS        | 4                 | 2                | 10                | 20                | 14                  | 2                | 2                | 3                | 35                | 12                | 13                 | 2                | 15                  | 8                 | 3                | 7                  | 0                | 14                | 2                 |
| TOT       |           | 2.4<br>(0.24-3.9) | 1.7<br>(0.9-2.9) | 8.3<br>(3.4-17.2) | 36<br>(13.8-53.2) | 18.6<br>(10.7-30.4) | 1.2<br>(0.2-3.3) | 1.9<br>(0.4-2.8) | 1.3<br>(0-4.4)   | 30.7<br>(11-45)   | 9.7<br>(3.4-23.5) | 11.8<br>(6-17.6)   | 1.1<br>(0.1-4.7) | 14.8<br>(9.7-22.9)  | 6.8<br>(2.6-10.6) | 2.4<br>(0.8-2.6) | 9.4<br>(3.3-18.6)  | 0.1<br>(0-1.7)   | 3.4<br>(1.7-7)    | 3.3<br>(0.7-13.5) |
| BxPc-3    | HS        | 0                 | 0                | 12                | 18                | 15                  | 0                | 2                | 1                | 6                 | 7                 | 12                 | 1                | 17                  | 2                 | 0                | 13                 | 5                | 8                 | 9                 |
| PaCa-3    | HS        | 20                | 2                | 2                 | 4                 | 13                  | 2                | 1                | 1                | 2                 | 2                 | 3                  | 2                | 58                  | 2                 | 1                | 48                 | 1                | 14                | 2                 |
| CFPAC-1   | HS        | 13                | 9                | 9                 | 72                | 55                  | 39               | 10               | 10               | 91                | 5                 | 59                 | 44               | 66                  | 44                | 31               | 26                 | 16               | 9                 | 27                |
| A8184     | HS        | 2                 | 1                | 4                 | 48                | 25                  | 3                | 2                | 2                | 23                | 5                 | 7                  | 3                | 54                  | 6                 | 5                | 7                  | 3                | 21                | 4                 |
| TOT       |           | 7.2<br>(0.7-18.4) | 1.3<br>(0.6-7.2) | 6<br>(2.7-11)     | 33<br>(7.3-66.3)  | 20.1<br>(13.5-47.8) | 2.6<br>(0.9-30)  | 2<br>(0.9-7.8)   | 1.6<br>(0.7-8.1) | 14.5<br>(3.2-73)  | 4.6<br>(2.6-6.2)  | 9.6<br>(4.3-47.4)  | 2.6<br>(0.9-34)  | 55.8<br>(26-64)     | 4<br>(2.1-34.4)   | 3<br>(0.7-24.6)  | 19.4<br>(8.8-42.5) | 4<br>(1.7-13.5)  | 5.3<br>(3.2-27.8) | 6.6<br>(2.5-22.4) |

\* LS= Low-Stemness cell lines; MS= Medium-Stemness cell lines; HS=High-Stemness cell lines.

**Table S3.** Expression of factors relevant for the biological behavior of cancer cells by FACS analysis. Data are expressed as a percentage (%) of positive cells.

| Cell line       | Stemness* | CD220              | CD221         | Tie2              | CD117        | CD15              | CD49a               | CD49e               | CD318           | E-cadherin,       | CA19-9        | CD142          | CD200        | CD73          | CD166         | CD105          | CD31             | CD34             | Stro 1           |
|-----------------|-----------|--------------------|---------------|-------------------|--------------|-------------------|---------------------|---------------------|-----------------|-------------------|---------------|----------------|--------------|---------------|---------------|----------------|------------------|------------------|------------------|
| <b>MIAPaCa2</b> | <b>LS</b> | 54                 | 100           | 1                 | 69           | 1                 | 1                   | 95                  | 38              | 23                | 10            | 0              | 0            | 95            | -1            | 93             | 6                | 2                | 6                |
| <b>Hst-766</b>  | <b>LS</b> | 2                  | 84            | 30                | 9            | 2                 | 9                   | 62                  | 94              | 5                 | 29            | 83             | 0            | 80            | 78            | 77             | 12               | 9                | 7                |
| <b>Panc-2</b>   | <b>LS</b> | 1                  | 99            | 7                 | 18           | 10                | 37                  | 90                  | 100             | 38                | 62            | 94             | 0            | 95            | 95            | 43             | 6                | 6                | 6                |
| <b>Panc-1</b>   | <b>LS</b> | 2                  | 29            | 3                 | 60           | 4                 | 13                  | 98                  | 93              | 9                 | 93            | 1              | 0            | 97            | 73            | 97             | 8                | 2                | 10               |
| <b>HPAF-II</b>  | <b>LS</b> | 2                  | 61            | 2                 | 6            | 7                 | 12                  | 16                  | 100             | 64                | 45            | 99             | 3            | 40            | 67            | 2              | 2                | 1                | 2                |
| <b>PT45</b>     | <b>LS</b> | 22                 | 99            | 5                 | 8            | 0                 | 84                  | 91                  | 59              | 4                 | 46            | 96             | 1            | 91            | 91            | 89             | 4                | 4                | 4                |
| <b>PC</b>       | <b>LS</b> | 7                  | 55            | 7                 | 6            | 2                 | 0                   | 20                  | 81              | 4                 | 76            | 2              | 0            | 91            | 19            | 53             | 8                | 5                | 6                |
| <b>AsPC-1</b>   | <b>LS</b> | 27                 | 100           | 9                 | 4            | 1                 | 2                   | 21                  | 96              | 6                 | 97            | 46             | 0            | 91            | 43            | 11             | 3                | 2                | 2                |
| <b>BI</b>       | <b>LS</b> | 1                  | 13            | 3                 | 3            | 14                | 4                   | 1                   | 91              | 2                 | 93            | 14             | 0            | 76            | 84            | 10             | 6                | 0                | 3                |
| <b>Tot</b>      |           | 2.2<br>(1.2-24.4)  | 84<br>(42-99) | 5.3<br>(3.1-25.1) | 8 (5-39)     | 1.8<br>(1.-8.1)   | 8.5<br>(1.5-25.1)   | 61.7<br>(18.4-92.8) | 93<br>(70-98)   | 6.4<br>(4.3-30.6) | 62<br>(37-93) | 46<br>(1.3-95) | 0<br>(0-0.5) | 91<br>(78-95) | 73<br>(31-88) | 53<br>(10-91)  | 5.5<br>(3.2-7.9) | 2.1<br>(1.2-5.4) | 5.7<br>(2.2-6.5) |
| <b>PaCa-44</b>  | <b>MS</b> | 4                  | 78            | 4                 | 25           | 9                 | 34                  | 90                  | 99              | 9                 | 90            | 84             | 0            | 90            | 89            | 84             | 5                | 2                | 7                |
| <b>Capan-1</b>  | <b>MS</b> | 0                  | 39            | 2                 | 6            | 41                | 66                  | 64                  | 93              | 67                | 48            | 12             | 0            | 85            | 92            | 6              | 2                | 2                | 1                |
| <b>T3M4</b>     | <b>MS</b> | 0                  | 97            | 5                 | 1            | 0                 | 17                  | 85                  | 100             | 11                | 0             | 97             | 0            | 85            | 88            | 49             | 5                | 0                | 1                |
| <b>SKPC-1</b>   | <b>MS</b> | 1                  | 99            | 2                 | 16           | 0                 | 65                  | 75                  | 100             | 25                | 95            | 91             | 1            | 96            | 95            | 84             | 4                | 2                | 11               |
| <b>Tot</b>      |           | 1<br>(0.1-3.6)     | 88<br>(49-99) | 3.1<br>(1.8-5)    | 10<br>(2-23) | 4.5<br>(0.1-33)   | 49.1<br>(21-65.3)   | 80<br>(66.4-88.5)   | 100<br>(95-100) | 18 (9.6-56.2)     | 69<br>(12-93) | 88<br>(30-96)  | 0<br>(0-0.4) | 87<br>(85-95) | 90<br>(88-95) | 66<br>(17-84)  | 4.4<br>(2.4-4.8) | 1.7<br>(0.4-2.1) | 3.8<br>(0.8-9.9) |
| <b>BxPc-3</b>   | <b>HS</b> | 1                  | 82            | 4                 | 3            | 0                 | 11                  | 73                  | 99              | 44                | 71            | 96             | 0            | 88            | 23            | 2              | 1                | 1                | 1                |
| <b>PaCa-3</b>   | <b>HS</b> | 43                 | 100           | 5                 | 11           | 5                 | 96                  | 96                  | 96              | 64                | 77            | 0              | 0            | 95            | 96            | 7              | 5                | 3                | 4                |
| <b>CFPAC-1</b>  | <b>HS</b> | 10                 | 98            | 45                | 18           | 3                 | 86                  | 89                  | 100             | 28                | 31            | 49             | 0            | 93            | 95            | 46             | 10               | 2                | 16               |
| <b>A8184</b>    | <b>HS</b> | 38                 | 49            | 72                | 19           | 0                 | 74                  | 74                  | 100             | 15                | 94            | 0              | 0            | 94            | 91            | 31             | 2                | 0                | 2                |
| <b>TOT</b>      |           | 23.7<br>(2.9-41.4) | 90<br>(58-99) | 26<br>(4.2-65)    | 14<br>(5-19) | 1.6<br>(0.21-4.6) | 80.1<br>(26.5-93.6) | 82<br>(73-94)       | 100<br>(97-100) | 36<br>(18.5-59)   | 74<br>(41-90) | 25<br>(0.1-84) | 0<br>(0-0.2) | 93<br>(89-95) | 93<br>(40-96) | 19<br>(3.2-42) | 3.2<br>(0.9-9)   | 1 (0.1-2.9)      | 3<br>(1-13)      |

\* LS= Low-Stemness cell lines; MS= Medium-Stemness cell lines; HS=High-Stemness cell lines.

**Table S4.** Human PDAC cell lines.

| Name      | Origin                | Supplier        | Stabilized by     | Patient |           |       |
|-----------|-----------------------|-----------------|-------------------|---------|-----------|-------|
|           |                       |                 |                   | Sex     | Age (yrs) | Grade |
| Panc-1    | Primary tumor         | ATCC            | M. Lieber (US)    | M       | 56        | 3     |
| PT45      | Primary tumor         | N. Lemoine      | H. Yamada (Japan) | -       | -         | 3     |
| MIAPaCa-2 | Primary tumor         | ATCC            | A. Yunis          | M       | 65        | 3     |
| SKPC-1    | Primary tumor         | A. Scarpa       | M.R. Vila (Spain) | M       | -         | -     |
| BI        | Primary tumor         | Andren-Sandberg | Andren-Sandberg   | -       | -         | -     |
| PC        | Primary tumor         | A. Scarpa       | Andren-Sandberg   | -       | -         | -     |
| Panc-2    | Primary tumor         | A. Scarpa       | M.v Bulow         | F       | 70        | 3     |
| PaCa-3    | Primary tumor         | A. Scarpa       | M.v Bulow         | M       | -         | 3     |
| PaCa-44   | Primary tumor         | M.v Bulow       | M.v Bulow         | F       | 44        | 2     |
| BxPc-3    | Primary tumor         | ATCC            | M.H. Tan          | F       | 61        | 2     |
| Capan-1   | Liver metastasis      | A. Scarpa       | Kyriazis AP       | M       | 40        | 1     |
| CFPAC-1   | Liver metastasis      | N. Lemoine      | R.A. Schoumacher  | M       | 26        | 1     |
| Hst-766   | Lymph node metastasis | ATCC            | Smith HS          | M       | 64        | 2     |
| T3M4      | Lymph node metastasis | N. Lemoine      | T. Okabe          | M       | 64        | 2     |
| A8184     | Ascites               | ATCC            | -                 | F       | 75        | 2     |
| HPAF-II   | Ascites               | ATCC            | Metzgar R.S.      | M       | 44        | 2     |
| AsPC-1    | Ascites               | ATCC            | Chen and M.H. Tan | F       | 62        | 2     |

**Table S5.** Antibodies used for FACS analysis.

|                | <b>Marker</b>                                         | <b>Clone</b> | <b>Species</b>    | <b>Isotype</b> | <b>Conjugate</b> | <b>Vendor</b>                 |
|----------------|-------------------------------------------------------|--------------|-------------------|----------------|------------------|-------------------------------|
| <b>CA19-9</b>  | sialyl-Lewis <sup>A</sup>                             | 241          | Monoclonal, mouse | IgG1           | none             | GeneTex, Inc., Irvine CA, USA |
| <b>CD133/1</b> | prominin-1                                            | AC133        | Monoclonal, mouse | IgG1           | PE               | Miltenyi Biotec, Germany      |
| <b>ESA</b>     | epithelial cell adhesion molecule (EpCAM)             | 9C4          | Monoclonal, mouse | IgG            | FITC             | Abcam, Cambridge, USA         |
| <b>CD24</b>    | Small Cell Lung Carcinoma Cluster 4 Antigen           | ML5          | Monoclonal, mouse | IgG2a          | PE               | BD Bioscience, CA             |
| <b>CD44</b>    | P-glycoprotein 1                                      | G44-26       | Monoclonal, mouse | IgG2b          | APC              | BD Bioscience, CA             |
| <b>CCR1</b>    | C-C Motif Chemokine Receptor 1                        | 53504        | Monoclonal, mouse | IgG2b          | PE               | R&D Systems,Minneapolis,MN    |
| <b>CCR2</b>    | C-C Motif Chemokine Receptor 2                        | 48607        | Monoclonal, mouse | IgG2b          | PE               | R&D Systems,Minneapolis,MN    |
| <b>CCR3</b>    | C-C Motif Chemokine Receptor 3                        | 61828        | Monoclonal, mouse | IgG2a          | PE               | R&D Systems,Minneapolis,MN    |
| <b>CCR4</b>    | C-C Motif Chemokine Receptor 4                        | 205410       | Monoclonal, mouse | IgG2b          | PE               | R&D Systems,Minneapolis,MN    |
| <b>CCR5</b>    | C-C Motif Chemokine Receptor 5                        | CTC5         | Monoclonal, mouse | IgG1           | PE               | R&D Systems,Minneapolis,MN    |
| <b>CCR6</b>    | C-C Motif Chemokine Receptor 6                        | 53103        | Monoclonal, mouse | IgG2b          | PE               | R&D Systems,Minneapolis,MN    |
| <b>CCR7</b>    | C-C Motif Chemokine Receptor 7                        | 150503       | Monoclonal, mouse | IgG2a          | PE               | R&D Systems,Minneapolis,MN    |
| <b>CCR8</b>    | C-C Motif Chemokine Receptor 8                        | 191704       | Monoclonal, mouse | IgG2b          | PE               | R&D Systems,Minneapolis,MN    |
| <b>CCR9</b>    | C-C Motif Chemokine Receptor 9                        | 112509       | Monoclonal, mouse | IgG2a          | PE               | R&D Systems,Minneapolis,MN    |
| <b>CCR10</b>   | C-C Motif Chemokine Receptor 10                       | 314305       | Monoclonal, mouse | IgG2a          | APC              | R&D Systems,Minneapolis,MN    |
| <b>CXCR1</b>   | C-X-C Motif Chemokine Receptor 1                      | 42705        | Monoclonal, mouse | IgG2a          | PE               | R&D Systems,Minneapolis,MN    |
| <b>CXCR2</b>   | C-X-C Motif Chemokine Receptor 2                      | 48311        | Monoclonal, mouse | IgG2a          | PE               | R&D Systems,Minneapolis,MN    |
| <b>CXCR3</b>   | C-X-C Motif Chemokine Receptor 3                      | 49801        | Monoclonal, mouse | IgG1           | PE               | R&D Systems,Minneapolis,MN    |
| <b>CXCR4</b>   | C-X-C Motif Chemokine Receptor 4                      | 12G5         | Monoclonal, mouse | IgG2a          | PE               | R&D Systems,Minneapolis,MN    |
| <b>CXCR5</b>   | C-X-C Motif Chemokine Receptor 5                      | 51505        | Monoclonal, mouse | IgG2b          | PE               | R&D Systems,Minneapolis,MN    |
| <b>CXCR6</b>   | C-X-C Motif Chemokine Receptor 2                      | 56811        | Monoclonal, mouse | IgG2b          | PE               | R&D Systems,Minneapolis,MN    |
| <b>CX3CR1</b>  | C-X3-C Motif Chemokine Receptor 1                     | 2A9-1        | Monoclonal, mouse | IgG2b          | PE               | MBL, Japan                    |
| <b>XCR1</b>    | X-C Motif Chemokine Receptor 1                        | AAIL01       | Polyclonal, goat  | IgG            | PE               | R&D Systems,Minneapolis,MN    |
| <b>CD220</b>   | Insulin receptor                                      | 3B6/IR       | Monoclonal, mouse | IgG1,k         | PE               | BD Bioscience, CA             |
| <b>CD221</b>   | Insulin-like growth factor                            | 1H7          | Monoclonal, mouse | IgG1,k         | PE               | BD Bioscience, CA             |
| <b>Tie2</b>    | Epidermal growth factor homology domain 2             | 83715        | Monoclonal, mouse | IgG            | APC              | R&D Systems,Minneapolis,MN    |
| <b>CD15</b>    | Lewis x                                               | HI98         | Monoclonal, mouse | IgM,k          | FITC             | BD Bioscience, CA             |
| <b>CD318</b>   | CUB domain-containing protein 1                       | CUB1         | Monoclonal, mouse | IgG2b          | APC              | Biolegend, CA                 |
| <b>CD142</b>   | Tissue Factor                                         | CLB/TF-5     | Monoclonal, mouse | IgG1           | FITC             | Novus Biologicals, USA        |
| <b>CD200</b>   | OX2 membrane glycoprotein                             | MRC OX-104   | Monoclonal, mouse | IgG1,k         | PE               | BD Bioscience, CA             |
| <b>CD166</b>   | Activated Leukocyte Cell Adhesion Molecule (ALCAM)    | 105902       | Monoclonal, mouse | IgG            | PE               | R&D Systems,Minneapolis,MN    |
| <b>CD117</b>   | Stem Cell Factor Receptor, C-Kit                      | YB5.B8       | Monoclonal, mouse | IgG1,k         | APC              | BD Bioscience, CA             |
| <b>CD105</b>   | Endoglin                                              | 166707       | Monoclonal, mouse | IgG            | FITC             | R&D Systems,Minneapolis,MN    |
| <b>CD49a</b>   | Integrin alpha-1                                      | SR84         | Monoclonal, mouse | IgG1,k         | PE               | BD Bioscience, CA             |
| <b>CD49e</b>   | Integrin alpha-5                                      | IIA1         | Monoclonal, mouse | IgG1,k         | PE               | BD Bioscience, CA             |
| <b>CD73</b>    | Ecto-5'-nucleotidase                                  | AD2          | Monoclonal, mouse | IgG1,k         | PE               | BD Bioscience, CA             |
| <b>CD31</b>    | Platelet endothelial cell adhesion molecule (PECAM-1) | WM59         | Monoclonal, mouse | IgG1,k         | FITC             | BD Bioscience, CA             |
| <b>Stro-1</b>  | Platelet endothelial cell adhesion molecule (PECAM-1) | STRO-1       | Monoclonal, mouse | IgM            | none             | BD Bioscience, CA             |
| <b>CD324</b>   | E-cadherin                                            | 180224       | Monoclonal, mouse | IgG2b          | APC              | R&D Systems,Minneapolis,MN    |



**Table S6.** Gene expression assays (Applied Biosystems) used for expression analysis.

| <b>Gene name</b>  | <b>Protein</b>                                | <b>Assay number</b> |
|-------------------|-----------------------------------------------|---------------------|
| <i>CHGA</i>       | Chromogranin A                                | Hs00154441_m1       |
| <i>CHGB</i>       | Chromogranin B                                | Hs00174956_m1       |
| <i>GAD2</i>       | Glutamate decarboxylase 2                     | Hs00609529_m1       |
| <i>GCG</i>        | Glucagon                                      | Hs00174967_m1       |
| <i>INS</i>        | Insulin                                       | Hs00356618_m1       |
| <i>ISL1</i>       | Insulin gene enhancer protein ISL-1           | Hs00158126_m1       |
| <i>ONECUT1</i>    | One cut homeobox 1                            | Hs00413554_m1       |
| <i>KRT19</i>      | Keratin, type I cytoskeletal 19               | Hs00761767_s1       |
| <i>NEUROD1</i>    | Neurogenic differentiation factor 1           | Hs00139598_m1       |
| <i>NGN3</i>       | Neurogenin-3                                  | Hs00360700_g1       |
| <i>NKX2.2</i>     | NK2 Homeobox 2                                | Hs00159616_m1       |
| <i>NKX6.1</i>     | Homeobox protein Nkx-6.1                      | Hs00232355_m1       |
| <i>PAX4</i>       | Paired box protein Pax-4                      | Hs00927346_g1       |
| <i>PAX6</i>       | Paired box protein Pax-6                      | Hs00242217_m1       |
| <i>PDX1</i>       | Pancreas/duodenum homeobox protein 1          | Hs00426216_m1       |
| <i>PTF1-alpha</i> | Pancreas transcription factor 1 subunit alpha | Hs00603586_g1       |
| <i>SYP</i>        | Synaptophysin                                 | Hs00300531_m1       |
| <i>GAPDH</i>      | Glyceraldehyde-3-phosphate dehydrogenase      | Hs99999905_m1       |
| <i>HNF1-beta</i>  | Hepatocyte nuclear factor 1 beta              | Hs00172123_m1       |
| <i>SOX17</i>      | SRY-box transcription factor 17               | Hs00751752_s1       |
| <i>NES</i>        | Nestin                                        | Hs00707120_s1       |
| <i>SNAI1</i>      | Snail family transcriptional repressor 1      | Hs00195591_m1       |
| <i>VIM</i>        | Vimentin                                      | Hs00185584_m1       |
